# Supplementary material for: Durian-like multi-functional Fe3O4–Au nanoparticles: synthesis, characterization and selective detection of benzidine
Source: Royal Society of Chemistry journal article supplement (doi:10.1039/c3ta11477e), 2013-01-01
Supplement: c3ta11477e.pdf [file c3ta11477e.pdf]

Electronic Supplementary Information (ESI) for:

**Durian-like multi-functional Fe<sub>3</sub>O<sub>4</sub>/Au nanoparticles: synthesis, characterization and selective detection of benzidine**

**Zhijiang Wang,<sup>a,†</sup> Lina Wu,<sup>b,c,†</sup> Fuping Wang,<sup>a</sup> Zhaohua Jiang<sup>\*a,d</sup> and Baozhong Shen<sup>\*b,c</sup>**

<sup>a</sup> School of Chemical Engineering and Technology, Harbin Institute of Technology, Harbin 150001, China. Fax: 86-451-86413707; Tel: 86-451- 86402805; E-mail: jiangzhaohua@hit.edu.cn.

<sup>b</sup> Department of Radiology, the 4th Affiliated Hospital of Harbin Medical University, Harbin, 150001, China. Fax: 86-451-82576509; Tel: 86-451- 85939999; E-mail: shenbzh@vip.sina.com.

<sup>c</sup> Key Laboratory of Molecular Imaging in College of Heilongjiang Province, Harbin Medical University, Harbin 150001, China.

<sup>d</sup> State Key Laboratory of Urban Water Resource and Environment, Harbin Institute of Technology, Harbin, 150001, China.

<sup>†</sup> These authors contributed equally to this work.

## 1. Characterization of building blocks for the nanocomposites.

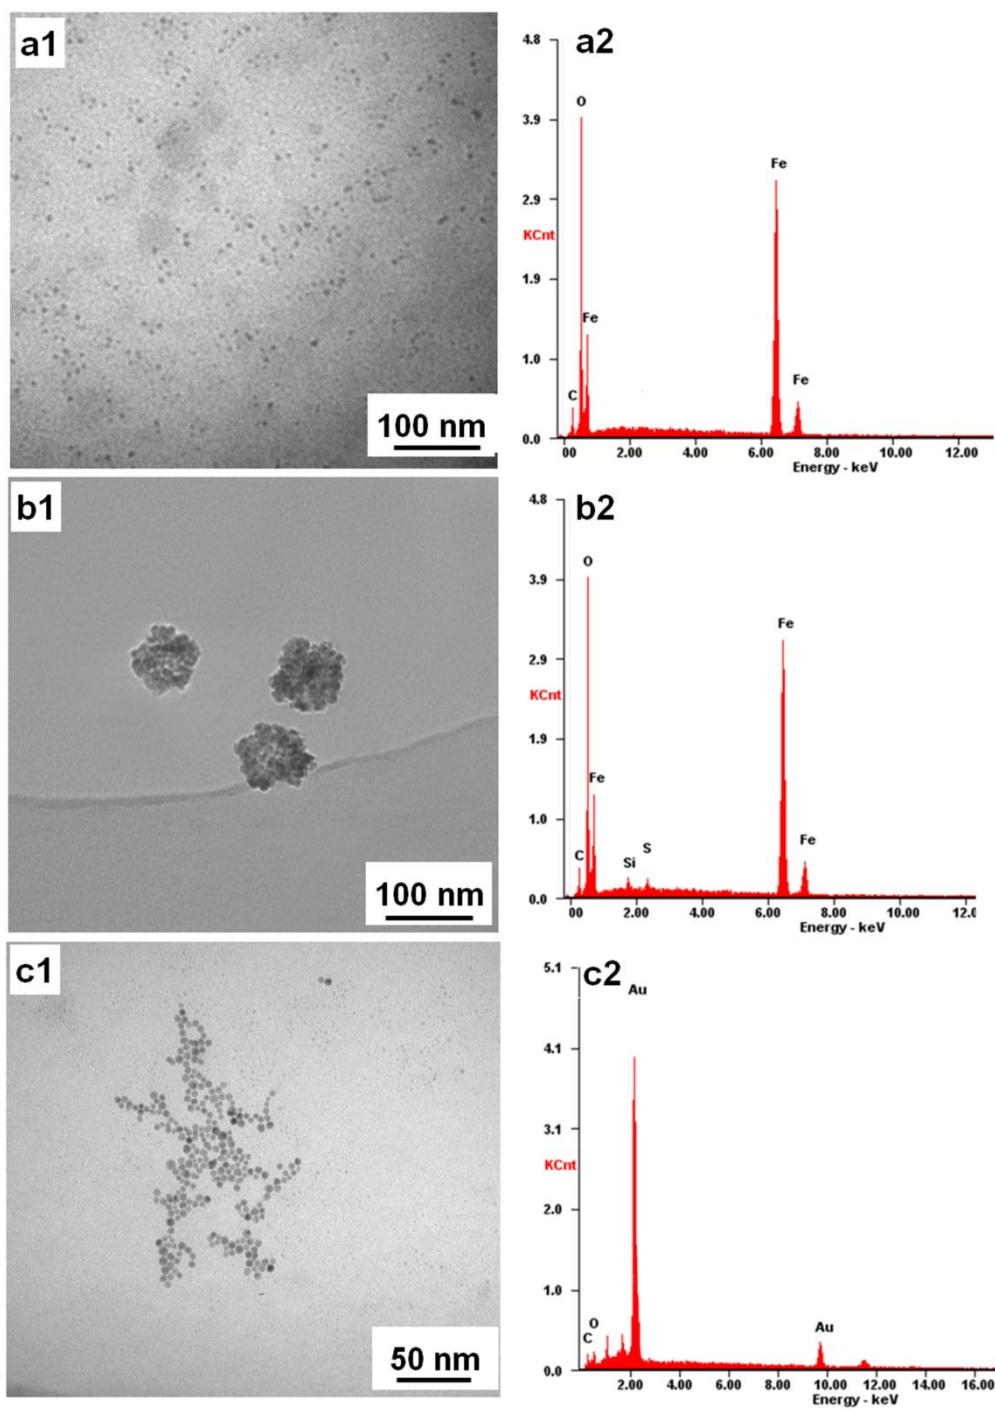

Figure S1. TEM and EDS analyses of Fe<sub>3</sub>O<sub>4</sub> nanoparticles (a), mercapto-modified Fe<sub>3</sub>O<sub>4</sub> nanoparticle clusters (b), and gold nanoparticles (c).

## 2. Influence of Au:Fe<sub>3</sub>O<sub>4</sub> ratio on benzidine detecting.

**Table S1.** The code and molar ratio of materials in synthesis of Fe<sub>3</sub>O<sub>4</sub>/Au nanocomposites.

| Code | Au nanoparticles<br>( $1.4 \times 10^{-10}$ mol/L) | Fe <sub>3</sub> O <sub>4</sub> nanoparticles<br>( $3.2 \times 10^{-8}$ mol/L) | Molar ratio of<br>Au to Fe <sub>3</sub> O <sub>4</sub> |
|------|----------------------------------------------------|-------------------------------------------------------------------------------|--------------------------------------------------------|
| NC1  | 4 mL                                               | 4 mL                                                                          | 1:208                                                  |
| NC2  | 4 mL                                               | 2 mL                                                                          | 1:104                                                  |
| NC3  | 4 mL                                               | 1 mL                                                                          | 1:57                                                   |
| NC4  | 4 mL                                               | 0.2 mL                                                                        | 1:12                                                   |

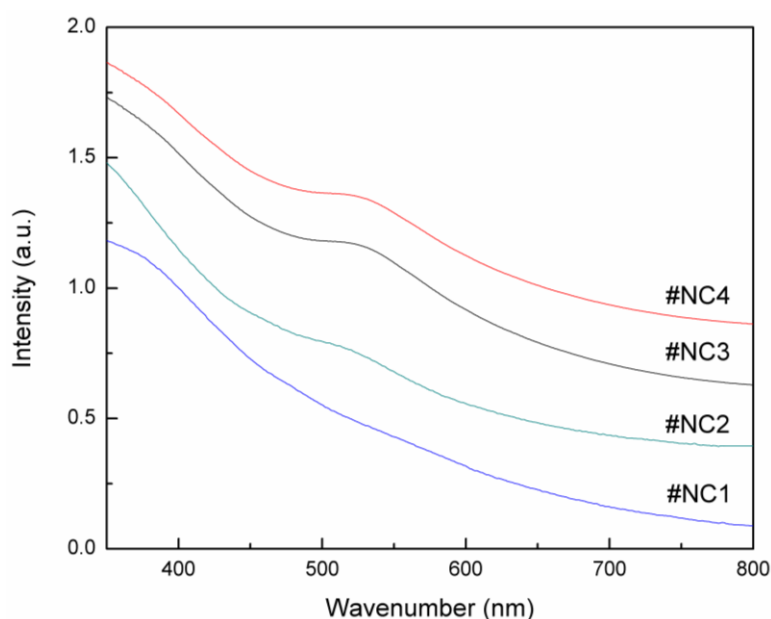

**Figure S2.** UV-vis absorption spectra of different nanocomposite samples. It can be found that there is almost no difference between the UV-vis absorption spectra of samples #NC3 and #NC4, indicating that when the molar ratio of Au:Fe<sub>3</sub>O<sub>4</sub> reaches 1:57, the nanocomposites achieve the highest gold loading amount by the present developed method. The further ICP-MS analysis showing gold content within a 3% difference between these two samples confirms this speculation.

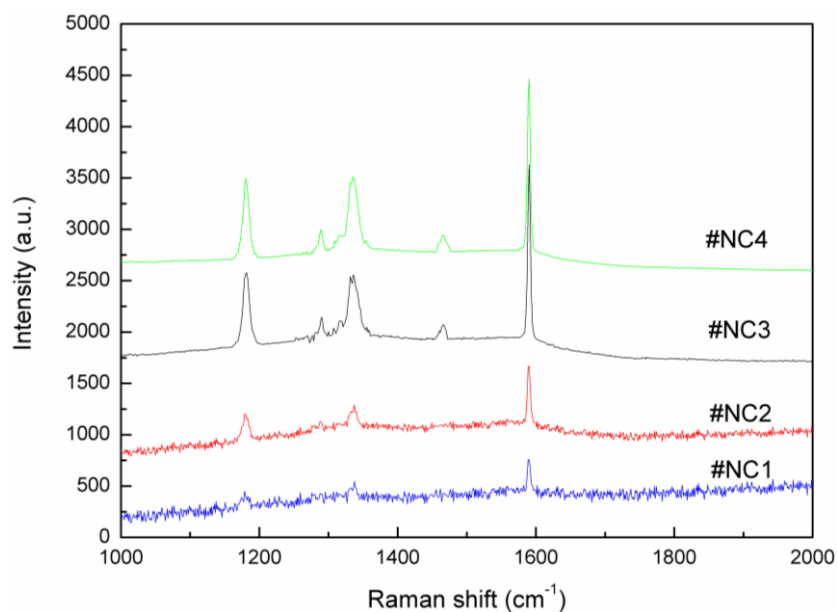

**Figure S3.** The Raman spectra of  $10^{-4}$  M benzidine collected on different nanocomposite samples. More gold amount achieves better SERS performance. As the gold amount of samples #NC3 and #NC4 is similar, they have comparable SERS enhancement.

### 3. Influence of heavy metal ions on the selectivity of developed nanosensor.

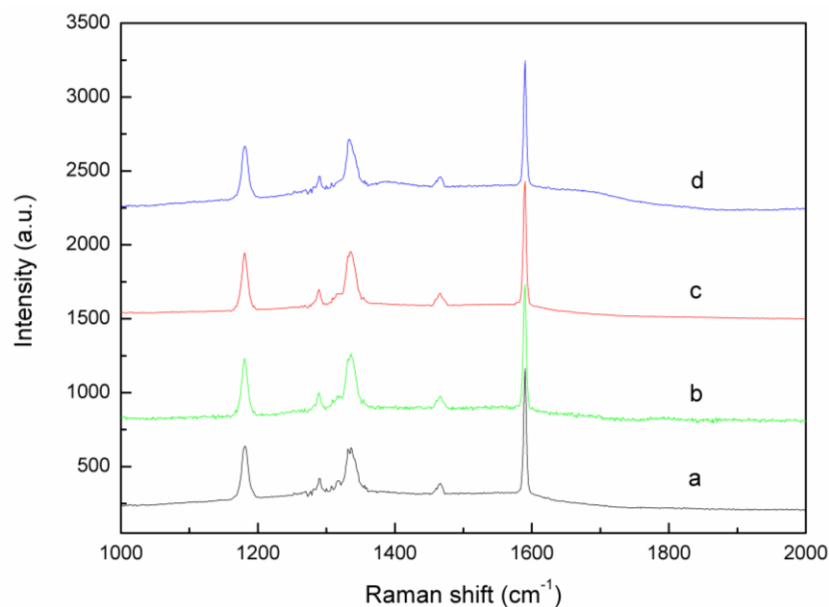

**Figure S4.** SERS spectra of  $10^{-5}$  M benzidine recorded on the substrates of Fe<sub>3</sub>O<sub>4</sub>/Au nanocomposites, (a) without heavy metal ions, (b) with  $10^{-5}$  M Hg<sup>2+</sup>, (c) with  $10^{-5}$  M Cd<sup>2+</sup> and (d) with  $10^{-5}$  M Pb<sup>2+</sup>. As shown in this figure, there is no big difference observed in the Raman spectra. The Hg<sup>2+</sup>, Cd<sup>2+</sup> and As<sup>5+</sup> ions have little influence on the selectivity of the sensing system.
